# Supplementary material
Source: publisher figshare collection journal article supplement (https://brill.figshare.com/articles/dataset/_/25392589)
Supplement: Supplementary file 1 [file 1]

## Sheet: instructions
Determination of the matrix uncertainty of feeding-stuffs according to DIN EN ISO 19036:2019 by the VDLUFA Working Group Microbiology
Explanation of terms	The matrix uncertainty umatrix is a measure of the uneven distribution of microorganisms in a heterogeneous sample.
	It is independent of the analytical methods (i.e. does not have to be determined for each method individually),
	but can be used in each case to describe the matrix effect in addition to the intralaboratory standard deviation (SIR)
	and the Poisson uncertainty. umatrix from publications/other laboratories may be adopted.
Method	Total bacteria/fungi count according to VDLUFA method no. 28.1.2
	Alternatively: another germ counting method (enterobacteria, etc.) that is useful for a specific feed type.
	MPN procedures are not suitable.
Implementation	either 11x1	11 initial suspensions from the same sample, optimally on the same day of preparation;
		under repeatability conditions: everything as identical as possible (lab technician, media batches, equipment, incubation time);
		suitable for rare feed species in large sample quantities;
		A former result should already be available to avoid results < LOD or > dilution range
		Risk that a laboratory error in a single subsample endangers the entire series. Maybe prepare 12x?
	or 10x2	2 initial suspensions each from 10 different samples accumulating within a longer period of time;
		the repeatability conditions apply only to the single duplicate determination;
		the double determination takes place on the same preparation day;
		suitable for frequent feed types and small sample quantities;
Count	The sum of the colonies of all plates used for evaluation must be at least 30.
	Counting should always be done by the same person
	Example:	Dilution step d1 with p1=2 plates: 1st plate 50 colonies + 2nd plate 52 colonies = 102 = k1
		Dilution stage d2 with p2=2 plates: 1st plate 3 colonies + 2nd plate 5 colonies = 8 = k2
		k1 + K2 = N = 110; N>30 therefore evaluable
Indication of results	Fill in all boxes outlined in red
	Calculations are automatic, cell protection is activated
	Duplicate tabs so that bacteria and fungi can be recorded in separate sheets

## Sheet: statistics
Appendix S1: Raw data feeding stuffs
	summarised data for figure 1								Additional information on minimum and maximum microbial counts and on the testing scheme																summarysied data for table 1
	Compilation of all test series listed in Figure 1								bacterial microorganism groups:								additional mycological microorganism groups:								soybean extraction meals:
									(B = mesophilic aerobic bacteria; E = Enterobacteriaceae)								(F = fungi; M = moulds and Dematiaceae; Y = yeasts)								(B = mesophilic aerobic bacteria)
		umatrix (log10 cfu/g)
German term:	matrix	bacteria	moulds and Dematiaceae	yeasts	fungi	Enterobacteriaceae	order		lab	Matrix	umatrix (log10 cfu/g)	min log cfu/g	max log cfu/g	10x2	1x11		lab	Matrix	umatrix (log10 cfu/g)	min log cfu/g	max log cfu/g	10x2	1x11		lab	Matrix	umatrix (log10 cfu/g)	min log cfu/g	max log cfu/g	10x2	1x11	additional grinding
Getreidemischschrot #2	grain meal #2	0.044	0.05				0.05		Nossen	grain meal #2 B	0.0439042	7.5563	7.6902		x		Münster	grain flower F	0.08	4.35218	4.63347		x		Oberschleißheim	soybean extraction meal #1 (LGL1) B	0.344	3.49643	4.52681		x
Hafer (Körner+Flocken)	oats	0.03			0.051		0.051		Halle	oats B	0.0304043	5.40577	8.24304	x			Oldenburg	brewers grain Y	0.086	4.61182	4.90062		x		Oberschleißheim	soybean extraction meal #2 (LGL2) B	0.326	3.56606	4.7313		x
Flüssigfutter	liquid feed	0.052					0.052		LALLF	liquid feed B	0.0516608	5.23736	5.40577		x		LTZ	hay2 F	0.092	3.21396	7.55751	x			Nossen	soybean extraction meal #3 (21P04597) B	0.475169	3.27875	4.74429		x
Mischfutter pel.	pelleted compound feed for chickens	0.075					0.075		Arnsberg	pelleted compound feed for chickens B	0.075	4.42843	4.67041		x		Linz	hay1 M	0.096	4.30103	6.86923	x			LTZ	soybean extraction meal #4 (LALLF FM-23-1529) B	0.213	5.09638	5.81795		x
Roggen (Körner+Schrot)	rye	0.085					0.085		Halle	rye B	0.0851748	6.21388	6.83942	x			Linz	hay1 Y	0.107	4.43136	6.33882	x			LTZ	soybean extraction meal #5 (LALLF FM-23-1529) B	0.304	4.90473	5.98391		x	x
complete feed for fattening pigs, floury	complete feed for fattening pigs, floury	0.09					0.09		Nossen	complete feed for fattening pigs, floury B	0.0896213	5.0136	5.33882		x		Jena	maize silage Y	0.103	3.33882	6.70329	x			LTZ	soybean extraction meal #6 (F220575) B	0.072	5.18906	5.45921		x	x
Geteidemehl	grain flour	0.091			0.08		0.091		Münster	grain flour B	0.091	5.87242	6.13033		x		Nossen	grain meal #1 Y	0.129	2.8145	3.20535		x		LTZ	soybean extraction meal #7 (F220575) B	0.092	5.22185	5.58186		x
Gerste (Körner+Schrot)	barley	0.088	0.066	0.097			0.097		LTZ	hay2 B	0.096	5.8617	7.9971	x			Halle	wheat M	0.0859914	3.67041	4.43573	x			LTZ	soybean extraction meal #8 (F221740) B	0.445	4.28767	5.71321		x
Heu #1	hay #1	0.076	0.096	0.107			0.107		Halle	barley B	0.087771	5.24864	7.43573	x			Halle	wheat Y	0.10733	3.34777	5.42843	x			LTZ	soybean extraction meal #9 (F221740) B	0.1	4.40056	4.76024		x	x
Weizenkörner	wheat	0.094	0.086	0.107			0.107		Linz	hay1 B	0.076	6.4843	9.04532	x			Halle	barley M	0.0661393	3.30103	5.46376	x
Grassilage	grass silage	0.109					0.109		Halle	wheat B	0.0943952	5.29105	6.44997	x			Halle	barley Y	0.0970121	3.18293	5.59208	x
Heu #2	hay #2	0.096			0.114		0.114		LTZ	grass silage	0.10864	4.3347	4.7579		x		Halle	oats F	0.0512494	4.19033	6.11546	x
Stroh	straw	0.12					0.12		LKS	straw B	0.115	6.36549	6.68124		x		Nossen	grain meal #2 M	0.0501426	5.16273	5.32034		x
Getreideschrot #1	grain meal #1	0.101		0.129			0.129		Nossen	grain meal #1 B	0.101	4.68696	4.94088		x		Halle	sunflower kernels F	0.062	1.7782	5.6398	x
Sonnenblumenkerne	sunflower kernels	0.132			0.062		0.132		Halle	sunflower kernels B	0.13224	2.18564	6.8451	x
Biertreber	brewers grain	0.19		0.086			0.19		Oldenburg	brewers grain B	0.19	5.87506	6.45067		x
Rapsextraktionsschrot	rape extraction meal	0.201					0.201		Nossen	rape extraction meal B	0.201407	2.29003	3.01912		x
BARF #2 (Leber)	BARF #2: liver					0.202	0.202		Kiel	BARF #2: liver E	0.202	5.97772	6.60206		x
Malzkeime	malt sprouts, pressed	0.219					0.219		Stade	malt sprouts, pressed	0.219245	7.79239	8.38917		x
Maissilage	maize silage	0.235		0.103			0.235		Jena	maize silage B	0.235	4.17609	7.8451	x
Kauspiel #2 (Lunge)	chew toy #2: dried beef lung	0.277					0.277		Stade	chew toy #2: dried beef lung B	0.277	4.31079	5.10006		x
BARF #1 (Fleisch)	BARF #1: coarsely chopped meat					0.402	0.402		Kiel	BARF #1: coarsely chopped meat E	0.402	6.05552	6.97144		x
Kauspiel #1 (Hälse)	chew toy #1: dried chicken necks	0.686					0.686		Stade	chew toy #1: dried chicken necks B	0.686	4.6353	6.97313		x
number of samples without soybean extraction meal (figure 1)		23
number of samples plus soybean extraction meal		29
number of test series without soybean extraction meal (figure 1)		37
number of test series plus soybean extraction meal		46

## Sheet: 11x1 SoyExMeal9B
Matrix uncertainty calculation according to Annex 1 of ISO 19036:2019
matrix:	soybean extraction meal #9				Sample preparation (ground, mashed, without, etc.):
method:	VDLUFA 28.1.2				ground with a ball mill before stomacher
lab:	LTZ Augustenberg						Repeatability conditions (yes/no):	yes
sample-no.:	total bacterial count, F221740
#	d1	p1	k1	d2	p2	k2	N	cfu	log cfu	(log cfu-log mean)2
1	3	3	152	4	3	17	169	51212.1	4.70937	0.000973455
2	3	3	176	4	3	6	182	55151.5	4.74156	0.00401765
3	3	3	72	4	3	11	83	25151.5	4.40056	0.0770664
4	3	3	167	4	3	16	183	55454.5	4.74394	0.00432499
5	3	3	156	4	3	13	169	51212.1	4.70937	0.000973455
6	3	3	183	4	3	7	190	57575.8	4.76024	0.00673502
7	3	3	126	4	3	15	141	42727.3	4.63071	0.00225315
8	3	3	156	4	3	15	171	51818.2	4.71448	0.00131839
9	3	3	143	4	3	11	154	46666.7	4.66901	8.40108e-05
10	3	3	140	4	3	13	153	46363.6	4.66618	0.000143881
11	3	3	155	4	3	16	171	51818.2	4.71448	0.00131839
										sum
comment							mean	48650.1	4.67817	0.0992088
							SD	8932.32	0.0996036
							rSD	18.3603	2.12911	umatrix
										0.0996036
								n	11
								degree of freedom	10
where
d1, d2	dilution level, e. g.: 10-d1
k1, k2	Number of colonies counted (of all plates of the respective dilution level).
p1, p2	Number of plates considered for the respective dilution levels
N	Sum of all counted colonies on the considered dilution levels; must be at least 30
cfu	Germ content in cfu/g or cfu/ml (weighted average according to ISO 7218)
log cfu	logarithmized germ content (log10)

## Sheet: 11x1 SoyExMeal8B
Matrix uncertainty calculation according to Annex 1 of ISO 19036:2019
matrix:	soybean extraction meal #8				Sample preparation (ground, mashed, without, etc.):
method:	VDLUFA 28.1.2				stomacher
lab:	LTZ Augustenberg						Repeatability conditions (yes/no):	yes
sample-no.:	total bacterial count, F221740
#	d1	p1	k1	d2	p2	k2	N	cfu	log cfu	(log cfu-log mean)2
1	4	3	155				155	516667	5.71321	0.498308
2	3	3	65	4	3	10	75	22727.3	4.35655	0.42348
3	4	3	77				77	256667	5.40937	0.161659
4	3	3	296	4	3	33	329	99697	4.99868	7.42849e-05
5	4	3	80				80	266667	5.42597	0.175283
6	3	3	180	4	3	26	206	62424.2	4.79535	0.0449218
7	3	3	378	4	3	58	436	132121	5.12097	0.0129213
8	3	3	143	4	3	16	159	48181.8	4.68288	0.105247
9	3	3	50	4	3	14	64	19393.9	4.28767	0.517874
10	3	3	423	4	3	67	490	148485	5.17168	0.0270212
11	3	3	360	4	3	73	433	131212	5.11797	0.0122485
										sum
comment							mean	154931	5.0073	1.97904
							SD	146172	0.444864
							rSD	94.3467	8.8843	umatrix
										0.444864
								n	11
								degree of freedom	10
where
d1, d2	dilution level, e. g.: 10-d1
k1, k2	Number of colonies counted (of all plates of the respective dilution level).
p1, p2	Number of plates considered for the respective dilution levels
N	Sum of all counted colonies on the considered dilution levels; must be at least 30
cfu	Germ content in cfu/g or cfu/ml (weighted average according to ISO 7218)
log cfu	logarithmized germ content (log10)

## Sheet: 11x1 SoyExMeal7B
Matrix uncertainty calculation according to Annex 1 of ISO 19036:2019
matrix:	soybean extraction meal #6				Sample preparation (ground, mashed, without, etc.):
method:	VDLUFA 28.1.2				stomacher
lab:	LTZ Augustenberg						Repeatability conditions (yes/no):	yes
sample-no.:	total bacterial count, F220575
#	d1	p1	k1	d2	p2	k2	N	cfu	log cfu	(log cfu-log mean)2
1	4	3	74	5	3	12	86	260606	5.41598	6.13803e-05
2	4	3	70	5	3	9	79	239394	5.37911	0.000843136
3	4	3	49	5	3	6	55	166667	5.22185	0.0347081
4	4	3	69	5	3	9	78	236364	5.37358	0.00119504
5	4	3	81	5	3	8	89	269697	5.43088	0.000516476
6	4	3	82	5	3	7	89	269697	5.43088	0.000516476
7	4	3	75	5	3	10	85	257576	5.4109	7.59022e-06
8	4	3	81	5	3	10	91	275758	5.44053	0.0010483
9	4	3	93	5	3	9	102	309091	5.49009	0.00671355
10	4	3	116	5	3	10	126	381818	5.58186	0.030174
11	4	3	62	5	3	6	68	206061	5.31399	0.00886516
										sum
comment							mean	261157	5.40815	0.0846493
							SD	55028.5	0.092005
							rSD	21.071	1.70123	umatrix
										0.092005
								n	11
								degree of freedom	10
where
d1, d2	dilution level, e. g.: 10-d1
k1, k2	Number of colonies counted (of all plates of the respective dilution level).
p1, p2	Number of plates considered for the respective dilution levels
N	Sum of all counted colonies on the considered dilution levels; must be at least 30
cfu	Germ content in cfu/g or cfu/ml (weighted average according to ISO 7218)
log cfu	logarithmized germ content (log10)

## Sheet: 11x1 SoyExMeal6B 
Matrix uncertainty calculation according to Annex 1 of ISO 19036:2019
matrix:	soybean extraction meal #6				Sample preparation (ground, mashed, without, etc.):
method:	VDLUFA 28.1.2				ground with a ball mill before stomacher
lab:	LTZ Augustenberg						Repeatability conditions (yes/no):	yes
sample-no.:	total bacterial count, F220575
#	d1	p1	k1	d2	p2	k2	N	cfu	log cfu	(log cfu-log mean)2
1	4	3	68	5	3	7	75	227273	5.35655	0.000110768
2	4	3	70	5	3	5	75	227273	5.35655	0.000110768
3	4	3	48	5	3	3	51	154545	5.18906	0.0316896
4	4	3	76	5	3	6	82	248485	5.3953	0.000796816
5	4	3	71	5	2	3	74	231250	5.36408	8.94151e-06
6	4	3	86	5	3	9	95	287879	5.45921	0.00848935
7	4	3	71	5	3	9	80	242424	5.38458	0.000306392
8	4	3	61	5	3	7	68	206061	5.31399	0.00281717
9	4	3	84	5	3	8	92	278788	5.44527	0.00611554
10	4	3	66	5	3	10	76	230303	5.3623	2.27751e-05
11	4	3	74	5	3	11	85	257576	5.4109	0.00192133
										sum
comment							mean	235623	5.36707	0.0523895
							SD	35947	0.0723806
							rSD	15.2561	1.3486	umatrix
										0.0723806
								n	11
								degree of freedom	10
where
d1, d2	dilution level, e. g.: 10-d1
k1, k2	Number of colonies counted (of all plates of the respective dilution level).
p1, p2	Number of plates considered for the respective dilution levels
N	Sum of all counted colonies on the considered dilution levels; must be at least 30
cfu	Germ content in cfu/g or cfu/ml (weighted average according to ISO 7218)
log cfu	logarithmized germ content (log10)

## Sheet: 11x1 SoyExMeal5 B
Matrix uncertainty calculation according to Annex 1 of ISO 19036:2019
matrix:	soybean extraction meal #5				Sample preparation (ground, mashed, without, etc.):
method:	VDLUFA 28.1.2				grinded with an IKA mill prior to stomacher
lab:	LTZ Augustenberg						Repeatability conditions (yes/no):	yes
sample-no.:	total bacterial count, FM-23-1529 (LALLF)
#	d1	p1	k1	d2	p2	k2	N	cfu	log cfu	(log cfu-log mean)2
F230744	3	3	697	4	3	82	779	236061	5.37302	0.0065542
F230745	4	3	188	5	3	28	216	654545	5.81594	0.131014
F230746	3	3	677	4	3	82	759	230000	5.36173	0.00851074
F230747	3	3	619	4	3	68	687	208182	5.31844	0.0183707
F230748	3	3	477	4	3	73	550	166667	5.22185	0.0538856
F230749	3	3	596	4	3	49	645	195455	5.29105	0.0265481
F230750	3	3	747	4	3	111	858	260000	5.41497	0.00152164
F230751	3	3	240	4	3	25	265	80303	4.90473	0.301675
F230752	4	3	284	5	3	34	318	963636	5.98391	0.280828
F230753	4	3	103	5	3	20	123	372727	5.57139	0.013785
F230754	4	3	158	5	3	22	180	545455	5.73676	0.0799629
										sum
comment							mean	355730	5.45398	0.922655
							SD	263340	0.303752
							rSD	74.0282	5.56937	umatrix
										0.303752
								n	11
								degree of freedom	10
where
d1, d2	dilution level, e. g.: 10-d1
k1, k2	Number of colonies counted (of all plates of the respective dilution level).
p1, p2	Number of plates considered for the respective dilution levels
N	Sum of all counted colonies on the considered dilution levels; must be at least 30
cfu	Germ content in cfu/g or cfu/ml (weighted average according to ISO 7218)
log cfu	logarithmized germ content (log10)

## Sheet: 11x1 SoyExMeal4 B
Matrix uncertainty calculation according to Annex 1 of ISO 19036:2019
matrix:	soybean extraction meal #4				Sample preparation (ground, mashed, without, etc.):
method:	VDLUFA 28.1.2				stomacher
lab:	LTZ Augustenberg						Repeatability conditions (yes/no):	yes
sample-no.:	total bacterial count, FM-23-1529 (LALLF)
#	d1	p1	k1	d2	p2	k2	N	cfu	log cfu	(log cfu-log mean)2
F230732	3	3	376	4	3	36	412	124848	5.09638	0.0606648
F230733	3	3	468	4	3	53	521	157879	5.19832	0.0208403
F230734	3	3	465	4	3	64	529	160303	5.20494	0.0189734
F230735	3	3	420	4	3	63	483	146364	5.16543	0.0314184
F230736	4	3	195	5	3	22	217	657576	5.81795	0.225872
F230737	3	3	563				563	187667	5.27339	0.00480228
F230738	4	3	78	5	3	11	89	269697	5.43088	0.00777756
F230739	4	3	72	5	3	6	78	236364	5.37358	0.000954504
F230740	4	3	104	5	3	33	137	415152	5.61821	0.0759118
F230741	3	3	537				537	179000	5.25285	0.00806989
F230742	3	3	621	4	3	97	718	217576	5.33761	2.57568e-05
										sum
comment							mean	250220	5.34269	0.455311
							SD	157124	0.21338
							rSD	62.7942	3.99387	umatrix
										0.21338
								n	11
								degree of freedom	10
where
d1, d2	dilution level, e. g.: 10-d1
k1, k2	Number of colonies counted (of all plates of the respective dilution level).
p1, p2	Number of plates considered for the respective dilution levels
N	Sum of all counted colonies on the considered dilution levels; must be at least 30
cfu	Germ content in cfu/g or cfu/ml (weighted average according to ISO 7218)
log cfu	logarithmized germ content (log10)

## Sheet: 11x1 SoyExMeal3 B
Matrix uncertainty calculation according to Annex 1 of ISO 19036:2019
matrix:	soybean extraction meal #3				Sample preparation (ground, mashed, without, etc.):
method:	VDLUFA 28.1.2, bacteria				shaker 20 min
lab:	BfUL Nossen						Repeatability conditions (yes/no):	yes
sample-no.:	21P04597
#	d1	p1	k1	d2	p2	k2	N	cfu	log cfu	(log cfu-log mean)2
1	2	2	93				93	4650	3.66745	0.00990219
2	2	2	143				143	7150	3.85431	0.00762886
3	2	2	43				43	2150	3.33244	0.188811
4	2	2	58				58	2900	3.4624	0.0927597
5	2	2	38				38	1900	3.27875	0.238348
6	2	2	49				49	2450	3.38917	0.14273
7	2	2	59				59	2950	3.46982	0.0882926
8	2	2	107				107	5350	3.72835	0.00149065
9	2	2	244				244	12200	4.08636	0.102015
10	3	2	53				53	26500	4.42325	0.430708
11	3	2	111				111	55500	4.74429	0.955174
										sum
comment							mean	11245.5	3.76696	2.25786
							SD	16349.3	0.475169
							rSD	145.386	12.6141	umatrix
										0.475169
								n	11
								degree of freedom	10
where
d1, d2	dilution level, e. g.: 10-d1
k1, k2	Number of colonies counted (of all plates of the respective dilution level).
p1, p2	Number of plates considered for the respective dilution levels
N	Sum of all counted colonies on the considered dilution levels; must be at least 30
cfu	Germ content in cfu/g or cfu/ml (weighted average according to ISO 7218)
log cfu	logarithmized germ content (log10)

## Sheet: 11x1 SoyExMeal2 B
Matrix uncertainty calculation according to Annex 1 of ISO 19036:2019
matrix:	soybean extraction meal #2				Sample preparation (ground, mashed, without, etc.):
method:	VDLUFA 28.1.2 Bacteria				treated with stomacher
lab:	LGL Oberschleißheim						Repeatability conditions (yes/no):	yes
sample-no.:	LGL2
#	d1	p1	k1	d2	p2	k2	N	cfu	log cfu	(log cfu-log mean)2
1	2	2	105	3	2	8	113	5136.36	3.71066	0.00072415
2	2	2	318	3	2	34	352	16000	4.20412	0.270789
3	2	2	80	3	2	8	88	4000	3.60206	0.00667256
4	2	2	149	3	2	9	158	7181.82	3.85623	0.0297523
5	2	2	80	3	2	7	87	3954.55	3.5971	0.00750808
6	2	2	68	3	2	13	81	3681.82	3.56606	0.0138494
7	2	2	84	3	2	7	91	4136.36	3.61662	0.00450604
8	2	2	149	3	2	12	161	7318.18	3.8644	0.0326371
9	2	2	133	3	2	13	146	6636.36	3.82193	0.0190949
10	2	2	129	3	2	13	142	6454.55	3.80987	0.0159062
11				3	2	149	149	745	2.87216	0.658677
										sum
comment							mean	5931.36	3.68375	1.06012
							SD	3861.16	0.325594
							rSD	65.0974	8.83868	umatrix
										0.325594
								n	11
								degree of freedom	10
where
d1, d2	dilution level, e. g.: 10-d1
k1, k2	Number of colonies counted (of all plates of the respective dilution level).
p1, p2	Number of plates considered for the respective dilution levels
N	Sum of all counted colonies on the considered dilution levels; must be at least 30
cfu	Germ content in cfu/g or cfu/ml (weighted average according to ISO 7218)
log cfu	logarithmized germ content (log10)

[truncated: 38 more sheets: 11x1 SoyExMeal1 B, 11x1 grass silage, 11x1 brewers grain B, 11x1 brewers grain Y, 11x1 PelCompoundChick B, 11x1 grain meal1 B, 11x1 grain meal1 Y, 10x2 maize silage Y, 10x2 maize silage B, 11x1 BARF1 E, 11x1 BARF2 E, 10x2 hay1 B, 10x2 hay1 Y, 10x2 hay1 M, 10x2 hay2 B, 10x2 hay2 F, 11x1 grain flour B, 11x1 grain flour F, 11x1 chew toy1 B, 11x1 chew toy2 B …]
